# Supplementary material for: Spatially-coordinated airborne data and complementary products for aerosol, gas, cloud, and meteorological studies: The NASA ACTIVATE dataset
Source: Copernicus journal article supplement (doi:10.5194/essd-2023-109), 2023-03-29
Supplement: Supplementary file 1 [file essd-2023-109-supplement.pdf]

Table S1. Instrument performance summary for the King Air and HU-25 Falcon during ACTIVATE. OK = functioned well during the entire flight; “So So” = some loss of data quantity/quality; N/A = no usable data. Deployments are separated by blank rows: Deployment 1 (RF1-RF22), Deployment 2 (RF23-RF40), Deployment 3 (RF41-RF61), Deployment 4 (RF62-RF93), Deployment 5 (RF94-RF148), Deployment 6 (RF149-RF179).

| RF | Date      | King Air |        |     | Falcon |           |       |               |          |                    |               |     |       |      |                 |     |                 |
|----|-----------|----------|--------|-----|--------|-----------|-------|---------------|----------|--------------------|---------------|-----|-------|------|-----------------|-----|-----------------|
|    |           | AVAPS    | HSRL-2 | RSP | DLH    | Trace Gas | TAMMS | LARGE CDP/CAS | FCDP/2DS | LARGE Microphysics | LARGE Optical | CCN | AMS   | PILS | AC3 Cloud Water | CVI | State Variables |
| 1  | 2/14/2020 | OK       | OK     | OK  | OK     | So So     | OK    | So So         | OK       | OK                 | OK            | OK  | OK    | OK   | OK              | N/A | OK              |
| 2  | 2/15/2020 | OK       | OK     | OK  | OK     | So So     | OK    | So So         | OK       | OK                 | OK            | OK  | OK    | OK   | OK              | OK  | OK              |
| 3  | 2/17/2020 | OK       | OK     | OK  | OK     | So So     | OK    | So So         | OK       | OK                 | OK            | OK  | OK    | OK   | OK              | OK  | OK              |
| 4  | 2/21/2020 | N/A      | N/A    | N/A | OK     | So So     | OK    | So So         | OK       | OK                 | OK            | OK  | OK    | OK   | N/A             | OK  | OK              |
| 5  | 2/22/2020 | N/A      | N/A    | N/A | OK     | So So     | OK    | So So         | OK       | OK                 | OK            | OK  | OK    | OK   | OK              | OK  | OK              |
| 6  | 2/22/2020 | N/A      | N/A    | N/A | OK     | So So     | OK    | So So         | OK       | OK                 | OK            | OK  | OK    | OK   | OK              | OK  | OK              |
| 7  | 2/23/2020 | N/A      | N/A    | N/A | OK     | So So     | OK    | So So         | OK       | OK                 | OK            | OK  | OK    | OK   | N/A             | OK  | OK              |
| 8  | 2/23/2020 | N/A      | N/A    | N/A | OK     | So So     | OK    | So So         | OK       | OK                 | OK            | OK  | OK    | OK   | N/A             | OK  | OK              |
| 9  | 2/27/2020 | OK       | OK     | OK  | OK     | So So     | OK    | So So         | OK       | OK                 | OK            | OK  | OK    | OK   | OK              | OK  | OK              |
| 10 | 2/28/2020 | OK       | OK     | OK  | OK     | OK        | OK    | So So         | OK       | OK                 | OK            | OK  | OK    | OK   | OK              | OK  | OK              |
| 11 | 2/28/2020 | OK       | OK     | OK  | OK     | OK        | OK    | So So         | OK       | OK                 | OK            | OK  | OK    | OK   | OK              | OK  | OK              |
| 12 | 2/29/2020 | OK       | OK     | OK  | OK     | OK        | OK    | So So         | OK       | OK                 | OK            | OK  | OK    | OK   | OK              | OK  | OK              |
| 13 | 3/1/2020  | OK       | OK     | OK  | OK     | OK        | OK    | So So         | OK       | OK                 | OK            | OK  | OK    | OK   | OK              | OK  | OK              |
| 14 | 3/1/2020  | OK       | OK     | OK  | OK     | OK        | OK    | So So         | OK       | OK                 | OK            | OK  | OK    | OK   | OK              | OK  | OK              |
| 15 | 3/2/2020  | OK       | OK     | OK  | OK     | OK        | OK    | So So         | OK       | OK                 | OK            | OK  | OK    | OK   | OK              | OK  | OK              |
| 16 | 3/6/2020  | OK       | OK     | OK  | OK     | OK        | OK    | So So         | OK       | OK                 | OK            | OK  | OK    | OK   | OK              | OK  | OK              |
| 17 | 3/8/2020  | OK       | OK     | N/A | OK     | OK        | OK    | So So         | So So    | OK                 | OK            | OK  | OK    | OK   | OK              | OK  | OK              |
| 18 | 3/8/2020  | OK       | OK     | N/A | OK     | OK        | OK    | So So         | So So    | OK                 | OK            | OK  | OK    | OK   | OK              | OK  | OK              |
| 19 | 3/9/2020  | OK       | OK     | OK  | OK     | OK        | OK    | So So         | So So    | OK                 | OK            | OK  | OK    | OK   | OK              | OK  | OK              |
| 20 | 3/11/2020 | OK       | OK     | OK  | OK     | OK        | OK    | So So         | So So    | OK                 | OK            | OK  | So So | OK   | OK              | OK  | OK              |
| 21 | 3/12/2020 | OK       | OK     | OK  | OK     | OK        | OK    | So So         | So So    | OK                 | OK            | OK  | So So | OK   | OK              | OK  | OK              |
| 22 | 3/12/2020 | OK       | OK     | OK  | OK     | OK        | OK    | So So         | So So    | OK                 | OK            | OK  | So So | OK   | OK              | OK  | OK              |

|    |           |     |     |    |    |    |    |    |    |    |       |       |    |     |    |    |    |
|----|-----------|-----|-----|----|----|----|----|----|----|----|-------|-------|----|-----|----|----|----|
| 23 | 8/13/2020 | OK  | OK  | OK | OK | OK | OK | OK | OK | OK | OK    | OK    | OK | N/A | OK | OK | OK |
| 24 | 8/17/2020 | OK  | OK  | OK | OK | OK | OK | OK | OK | OK | OK    | OK    | OK | OK  | OK | OK | OK |
| 25 | 8/20/2020 | OK  | OK  | OK | OK | OK | OK | OK | OK | OK | OK    | OK    | OK | OK  | OK | OK | OK |
| 26 | 8/21/2020 | OK  | OK  | OK | OK | OK | OK | OK | OK | OK | So So | OK    | OK | OK  | OK | OK | OK |
| 27 | 8/25/2020 | OK  | OK  | OK | OK | OK | OK | OK | OK | OK | So So | OK    | OK | OK  | OK | OK | OK |
| 28 | 8/26/2020 | OK  | OK  | OK | OK | OK | OK | OK | OK | OK | So So | OK    | OK | OK  | OK | OK | OK |
| 29 | 8/28/2020 | OK  | OK  | OK | OK | OK | OK | OK | OK | OK | So So | OK    | OK | OK  | OK | OK | OK |
| 30 | 9/2/2020  | OK  | OK  | OK | OK | OK | OK | OK | OK | OK | OK    | OK    | OK | OK  | OK | OK | OK |
| 31 | 9/3/2020  | OK  | OK  | OK | OK | OK | OK | OK | OK | OK | OK    | OK    | OK | OK  | OK | OK | OK |
| 32 | 9/10/2020 | OK  | OK  | OK | OK | OK | OK | OK | OK | OK | OK    | OK    | OK | OK  | OK | OK | OK |
| 33 | 9/11/2020 | OK  | OK  | OK | OK | OK | OK | OK | OK | OK | OK    | OK    | OK | OK  | OK | OK | OK |
| 34 | 9/15/2020 | OK  | OK  | OK | OK | OK | OK | OK | OK | OK | OK    | N/A   | OK | OK  | OK | OK | OK |
| 35 | 9/16/2020 | N/A | N/A | OK    | N/A   | OK | OK  | OK | OK | OK |
| 36 | 9/21/2020 | OK  | OK  | OK | OK | OK | OK | OK | OK | OK | OK    | N/A   | OK | OK  | OK | OK | OK |
| 37 | 9/22/2020 | OK  | OK  | OK | OK | OK | OK | OK | OK | OK | OK    | So So | OK | OK  | OK | OK | OK |
| 38 | 9/23/2020 | OK  | OK  | OK | OK | OK | OK | OK | OK | OK | OK    | So So | OK | OK  | OK | OK | OK |
| 39 | 9/29/2020 | OK  | OK  | OK | OK | OK | OK | OK | OK | OK | OK    | So So | OK | OK  | OK | OK | OK |
| 40 | 9/30/2020 | OK  | OK  | OK | OK | OK | OK | OK | OK | OK | OK    | So So | OK | OK  | OK | OK | OK |

---

|    |           |     |     |     |     |     |     |       |     |       |     |     |     |     |     |       |     |
|----|-----------|-----|-----|-----|-----|-----|-----|-------|-----|-------|-----|-----|-----|-----|-----|-------|-----|
| 41 | 1/27/2021 | N/A | N/A | N/A | OK  | OK  | OK  | So So | OK  | So So | OK  | OK  | N/A | OK  | OK  | So So | OK  |
| 42 | 1/29/2021 | OK  | OK  | OK  | N/A | N/A | N/A | N/A   | N/A | N/A   | N/A | N/A | N/A | N/A | N/A | N/A   | N/A |
| 43 | 1/29/2021 | N/A | N/A | N/A | OK  | OK  | OK  | So So | OK  | OK    | OK  | OK  | OK  | OK  | OK  | OK    | OK  |
| 44 | 2/3/2021  | OK  | OK  | OK  | OK  | OK  | OK  | So So | OK  | OK    | OK  | OK  | OK  | OK  | OK  | OK    | OK  |
| 45 | 2/10/2021 | OK  | OK  | OK  | N/A | N/A | N/A | N/A   | N/A | N/A   | N/A | N/A | N/A | N/A | N/A | N/A   | N/A |
| 46 | 2/20/2021 | OK  | OK  | OK  | N/A | N/A | N/A | N/A   | N/A | N/A   | N/A | N/A | N/A | N/A | N/A | N/A   | N/A |
| 47 | 2/21/2021 | OK  | OK  | OK  | N/A | N/A | N/A | N/A   | N/A | N/A   | N/A | N/A | N/A | N/A | N/A | N/A   | N/A |
| 48 | 3/4/2021  | OK  | OK  | OK  | OK  | N/A | OK  | So So | OK  | OK    | OK  | OK  | N/A | N/A | OK  | N/A   | OK  |

|    |           |    |    |     |    |     |    |       |    |    |    |    |     |     |    |     |    |
|----|-----------|----|----|-----|----|-----|----|-------|----|----|----|----|-----|-----|----|-----|----|
| 49 | 3/5/2021  | OK | OK | OK  | OK | N/A | OK | So So | OK | OK | OK | OK | N/A | N/A | OK | N/A | OK |
| 50 | 3/5/2021  | OK | OK | OK  | OK | N/A | OK | So So | OK | OK | OK | OK | N/A | N/A | OK | N/A | OK |
| 51 | 3/8/2021  | OK | OK | OK  | OK | N/A | OK | So So | OK | OK | OK | OK | N/A | N/A | OK | N/A | OK |
| 52 | 3/9/2021  | OK | OK | OK  | OK | N/A | OK | So So | OK | OK | OK | OK | N/A | N/A | OK | N/A | OK |
| 53 | 3/12/2021 | OK | OK | OK  | OK | N/A | OK | So So | OK | OK | OK | OK | N/A | N/A | OK | N/A | OK |
| 54 | 3/12/2021 | OK | OK | OK  | OK | N/A | OK | So So | OK | OK | OK | OK | N/A | N/A | OK | N/A | OK |
| 55 | 3/20/2021 | OK | OK | OK  | OK | N/A | OK | So So | OK | OK | OK | OK | N/A | N/A | OK | N/A | OK |
| 56 | 3/23/2021 | OK | OK | OK  | OK | N/A | OK | So So | OK | OK | OK | OK | N/A | N/A | OK | N/A | OK |
| 57 | 3/29/2021 | OK | OK | OK  | OK | N/A | OK | So So | OK | OK | OK | OK | N/A | N/A | OK | N/A | OK |
| 58 | 3/30/2021 | OK | OK | OK  | OK | N/A | OK | So So | OK | OK | OK | OK | N/A | N/A | OK | N/A | OK |
| 59 | 3/30/2021 | OK | OK | OK  | OK | N/A | OK | So So | OK | OK | OK | OK | N/A | N/A | OK | N/A | OK |
| 60 | 4/2/2021  | OK | OK | OK  | OK | N/A | OK | So So | OK | OK | OK | OK | N/A | N/A | OK | N/A | OK |
| 61 | 4/2/2021  | OK | OK | N/A | OK | N/A | OK | So So | OK | OK | OK | OK | N/A | N/A | OK | N/A | OK |

|    |           |    |    |    |    |    |    |       |    |       |    |    |    |    |     |     |    |
|----|-----------|----|----|----|----|----|----|-------|----|-------|----|----|----|----|-----|-----|----|
| 62 | 5/13/2021 | OK | OK | OK | OK | OK | OK | So So | OK | OK    | OK | OK | OK | OK | OK  | N/A | OK |
| 63 | 5/14/2021 | OK | OK | OK | OK | OK | OK | So So | OK | OK    | OK | OK | OK | OK | N/A | OK  | OK |
| 64 | 5/14/2021 | OK | OK | OK | OK | OK | OK | So So | OK | OK    | OK | OK | OK | OK | N/A | OK  | OK |
| 65 | 5/15/2021 | OK | OK | OK | OK | OK | OK | So So | OK | OK    | OK | OK | OK | OK | N/A | OK  | OK |
| 66 | 5/18/2021 | OK | OK | OK | OK | OK | OK | So So | OK | OK    | OK | OK | OK | OK | OK  | OK  | OK |
| 67 | 5/19/2021 | OK | OK | OK | OK | OK | OK | So So | OK | OK    | OK | OK | OK | OK | OK  | OK  | OK |
| 68 | 5/19/2021 | OK | OK | OK | OK | OK | OK | So So | OK | OK    | OK | OK | OK | OK | OK  | OK  | OK |
| 69 | 5/20/2021 | OK | OK | OK | OK | OK | OK | So So | OK | OK    | OK | OK | OK | OK | OK  | OK  | OK |
| 70 | 5/21/2021 | OK | OK | OK | OK | OK | OK | So So | OK | OK    | OK | OK | OK | OK | OK  | OK  | OK |
| 71 | 5/21/2021 | OK | OK | OK | OK | OK | OK | So So | OK | OK    | OK | OK | OK | OK | OK  | OK  | OK |
| 72 | 5/25/2021 | OK | OK | OK | OK | OK | OK | So So | OK | OK    | OK | OK | OK | OK | OK  | OK  | OK |
| 73 | 5/26/2021 | OK | OK | OK | OK | OK | OK | So So | OK | OK    | OK | OK | OK | OK | OK  | OK  | OK |
| 74 | 5/26/2021 | OK | OK | OK | OK | OK | OK | So So | OK | OK    | OK | OK | OK | OK | OK  | OK  | OK |
| 75 | 6/1/2021  | OK | OK | OK | OK | OK | OK | So So | OK | OK    | OK | OK | OK | OK | OK  | OK  | OK |
| 76 | 6/2/2021  | OK | OK | OK | OK | OK | OK | So So | OK | OK    | OK | OK | OK | OK | OK  | OK  | OK |
| 77 | 6/2/2021  | OK | OK | OK | OK | OK | OK | So So | OK | So So | OK | OK | OK | OK | OK  | OK  | OK |
| 78 | 6/5/2021  | OK | OK | OK | OK | OK | OK | So So | OK | So So | OK | OK | OK | OK | OK  | OK  | OK |
| 79 | 6/7/2021  | OK | OK | OK | OK | OK | OK | So So | OK | So So | OK | OK | OK | OK | OK  | OK  | OK |



|     |           |     |     |     |    |       |    |    |    |    |    |          |     |          |    |          |    |
|-----|-----------|-----|-----|-----|----|-------|----|----|----|----|----|----------|-----|----------|----|----------|----|
| 111 | 1/26/2022 | OK  | OK  | OK  | OK | OK    | OK | OK | OK | OK | OK | OK       | OK  | OK       | OK | OK       | OK |
| 112 | 1/26/2022 | OK  | OK  | OK  | OK | OK    | OK | OK | OK | OK | OK | OK       | OK  | OK       | OK | OK       | OK |
| 113 | 1/27/2022 | OK  | OK  | OK  | OK | OK    | OK | OK | OK | OK | OK | OK       | OK  | OK       | OK | OK       | OK |
| 114 | 1/27/2022 | OK  | OK  | N/A | OK | OK    | OK | OK | OK | OK | OK | OK       | OK  | OK       | OK | OK       | OK |
| 115 | 2/1/2022  | OK  | OK  | OK  | OK | OK    | OK | OK | OK | OK | OK | OK       | OK  | OK       | OK | OK       | OK |
| 116 | 2/2/2022  | OK  | OK  | OK  | OK | OK    | OK | OK | OK | OK | OK | OK       | OK  | OK       | OK | OK       | OK |
| 117 | 2/3/2022  | OK  | OK  | OK  | OK | OK    | OK | OK | OK | OK | OK | OK       | OK  | OK       | OK | OK       | OK |
| 118 | 2/3/2022  | OK  | OK  | OK  | OK | OK    | OK | OK | OK | OK | OK | OK       | N/A | OK       | OK | So<br>So | OK |
| 119 | 2/5/2022  | OK  | OK  | OK  | OK | OK    | OK | OK | OK | OK | OK | OK       | OK  | OK       | OK | OK       | OK |
| 120 | 2/15/2022 | OK  | OK  | OK  | OK | OK    | OK | OK | OK | OK | OK | OK       | OK  | OK       | OK | OK       | OK |
| 121 | 2/15/2022 | OK  | OK  | OK  | OK | OK    | OK | OK | OK | OK | OK | OK       | OK  | OK       | OK | OK       | OK |
| 122 | 2/16/2022 | OK  | OK  | OK  | OK | OK    | OK | OK | OK | OK | OK | OK       | OK  | OK       | OK | OK       | OK |
| 123 | 2/16/2022 | OK  | OK  | OK  | OK | OK    | OK | OK | OK | OK | OK | OK       | OK  | OK       | OK | OK       | OK |
| 124 | 2/19/2022 | OK  | OK  | OK  | OK | OK    | OK | OK | OK | OK | OK | OK       | OK  | OK       | OK | OK       | OK |
| 125 | 2/19/2022 | OK  | OK  | OK  | OK | OK    | OK | OK | OK | OK | OK | OK       | OK  | OK       | OK | OK       | OK |
| 126 | 2/22/2022 | OK  | OK  | OK  | OK | OK    | OK | OK | OK | OK | OK | OK       | OK  | OK       | OK | OK       | OK |
| 127 | 2/22/2022 | OK  | OK  | OK  | OK | OK    | OK | OK | OK | OK | OK | OK       | OK  | OK       | OK | OK       | OK |
| 128 | 2/26/2022 | OK  | OK  | OK  | OK | OK    | OK | OK | OK | OK | OK | OK       | OK  | OK       | OK | OK       | OK |
| 129 | 2/26/2022 | N/A | N/A | OK  | OK | OK    | OK | OK | OK | OK | OK | OK       | OK  | OK       | OK | OK       | OK |
| 130 | 3/2/2022  | OK  | OK  | OK  | OK | OK    | OK | OK | OK | OK | OK | OK       | OK  | OK       | OK | OK       | OK |
| 131 | 3/3/2022  | OK  | OK  | OK  | OK | OK    | OK | OK | OK | OK | OK | OK       | OK  | OK       | OK | OK       | OK |
| 132 | 3/3/2022  | OK  | OK  | OK  | OK | OK    | OK | OK | OK | OK | OK | OK       | OK  | OK       | OK | OK       | OK |
| 133 | 3/4/2022  | OK  | OK  | OK  | OK | OK    | OK | OK | OK | OK | OK | OK       | OK  | OK       | OK | OK       | OK |
| 134 | 3/4/2022  | OK  | OK  | OK  | OK | OK    | OK | OK | OK | OK | OK | OK       | OK  | OK       | OK | OK       | OK |
| 135 | 3/7/2022  | OK  | OK  | OK  | OK | OK    | OK | OK | OK | OK | OK | OK       | OK  | So<br>So | OK | OK       | OK |
| 136 | 3/7/2022  | N/A | N/A | N/A | OK | OK    | OK | OK | OK | OK | OK | OK       | OK  | So<br>So | OK | OK       | OK |
| 137 | 3/13/2022 | OK  | OK  | OK  | OK | So So | OK | OK | OK | OK | OK | So<br>So | OK  | OK       | OK | OK       | OK |
| 138 | 3/13/2022 | OK  | OK  | OK  | OK | OK    | OK | OK | OK | OK | OK | So<br>So | OK  | OK       | OK | OK       | OK |





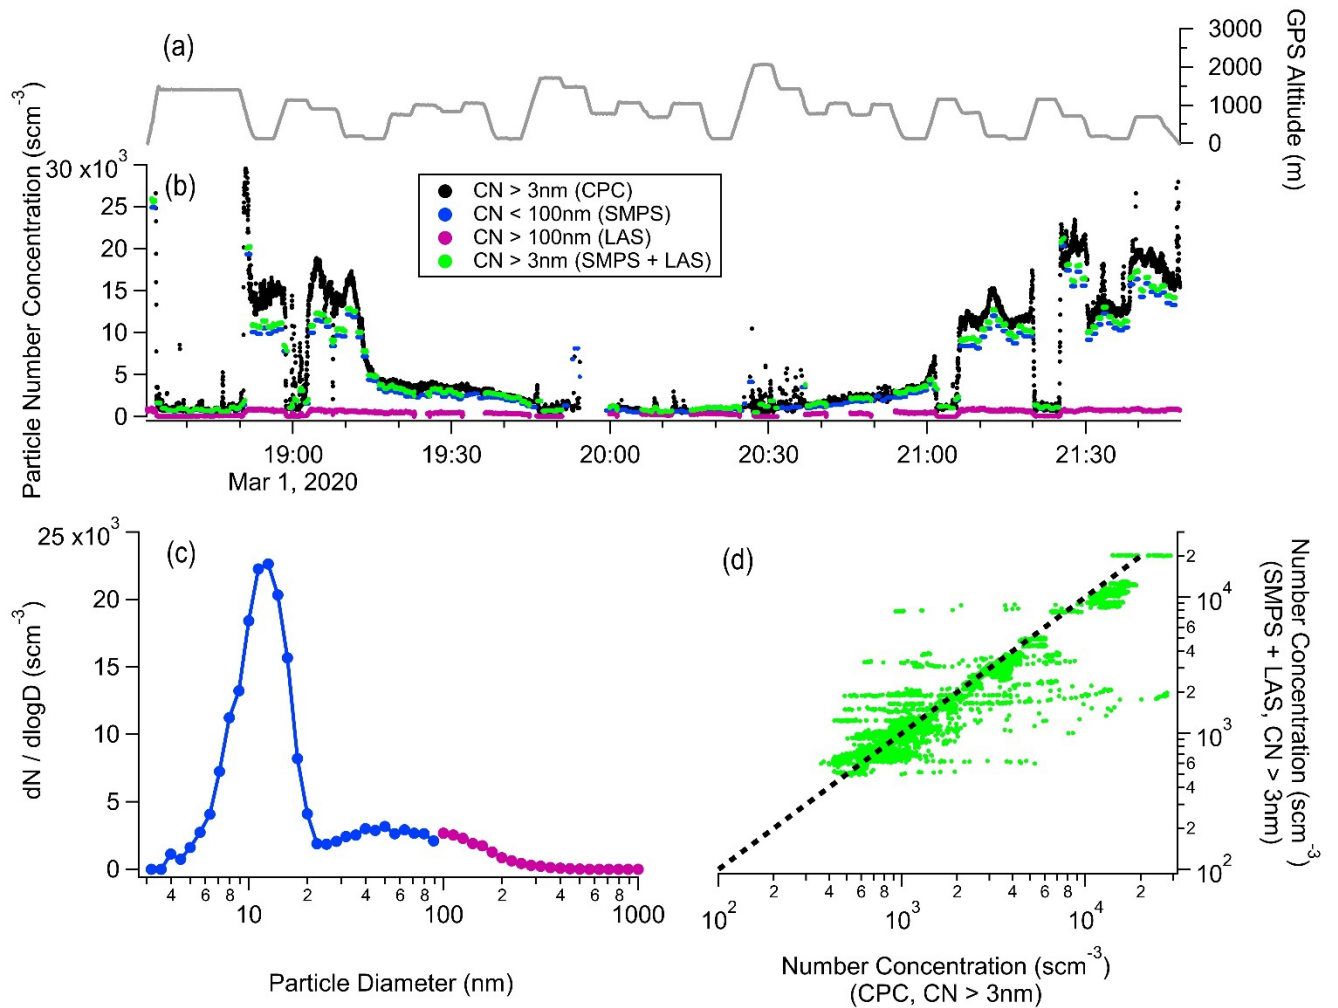

Figure S1: Closure analysis for particle number concentration measurements derived from an ultrafine CPC, SMPS, and LAS. (a-b) Timeseries data are shown for Research Flight 14 (1 March 2020), (c) an average size distribution during a MinAlt leg at approximately UTC 21:17, and (d) a scatterplot of the integrated number concentration derived from LAS+SMPS instruments against number concentration directly measured by a CPC.
